# Supplementary material
Source: publisher figshare collection journal article supplement (https://acs.figshare.com/ndownloader/files/4196827)
Supplement: Supplementary file 1 [file 4196827]

## Supporting Information

### A “Turn-on” Fluorescent Hg<sup>2+</sup> Chemosensor Based on Ferrier Carbocyclization

*Xing Ma, Jing Wang, Qiuli Shan, Zhuowei Tan, Guohua Wei\*, Dongbin Wei\*, Yuguo Du\**

## CONTENTS

Materials and Measurements

Synthesis of fluorescent probe **1**

References

General procedure for  $\text{Hg}^{2+}$  detection

**Fig. S1**  $^1\text{H}$  NMR of probe **1**

**Fig. S2**  $^{13}\text{C}$  NMR of probe **1**

**Fig. S3** Fluorescence intensity ( $\lambda_{\text{ex}}/\lambda_{\text{em}} = 570/594$  nm, slit widths 2.5 nm) of probe **1** (1.0  $\mu\text{M}$  in pure water) vs pH variation at room temperature.

**Fig. S4** 3D-EEM of probe **1** (20  $\mu\text{M}$  in pure water) before and after adding  $\text{Hg}^{2+}$  (1.0  $\mu\text{M}$  in pure water) at room temperature

**Fig. S5** Time-dependent fluorescence intensity ( $\lambda_{\text{ex}}/\lambda_{\text{em}} = 570/594$  nm, slit widths 2.5 nm) for the mixture of **1** and  $\text{Hg}^{2+}$  at room temperature, measured in PBS buffer at pH 7.4. (a) Concentrations of probe **1** and  $\text{Hg}^{2+}$  were 20  $\mu\text{M}$  and 1.0  $\mu\text{M}$ , respectively, (b) Concentrations of probe **1** and  $\text{Hg}^{2+}$  were 1.0  $\mu\text{M}$  and 0.5  $\mu\text{M}$ , respectively,

**Fig. S6** The variation of fluorescence intensity ( $\lambda_{\text{ex}}/\lambda_{\text{em}} = 570/594$  nm, slit widths 2.5 nm) of probe **1** (20  $\mu\text{M}$ ) in the presence of 1.0  $\mu\text{M}$  of  $\text{Hg}^{2+}$  with different pH values from 6.2 to 9.3.

**Fig. S7** Crude mass spectrum for the mixture of probe **1** and  $\text{HgCl}_2$ .

**Fig. S8** Fluorescence intensity changes ( $\lambda_{\text{ex}}/\lambda_{\text{em}} = 570/594$  nm, slit widths 2.5 nm) of probe **1** (1.0  $\mu\text{M}$  in pure water) as a function of equivalent of  $\text{Hg}^{2+}$  for each addition at room temperature (reacted 15 min and adjusted pH to 7.4 with PBS before determination).

## Materials and Measurements

Fluorescence spectra were obtained by using a Hitachi F-7000 Fluorescence Spectrometer equipped with a xenon lamp, 1.0 cm quartz cells, and slits of 2.5/2.5 nm. All chemicals were of reagent grade and used without further purification. Ultrapure water with a Millipore Purification System (Milli-Q water) was used throughout the analytical experiments. The  $^1\text{H}$  and  $^{13}\text{C}$  NMR spectra were recorded on ARX 400 spectrometers for solutions in  $(\text{CD}_3)_2\text{SO}$ . Chemical shifts are given in ppm downfield from internal  $\text{Me}_4\text{Si}$ . Mass spectrometry was conducted in a negative mode using ESI-source. Thin layer chromatography (TLC) was performed on silica gel  $\text{HF}_{254}$  with detection by charring with 30% (v/v)  $\text{H}_2\text{SO}_4$  in MeOH or in some cases by a UV detector.

The stock solution (10.0 mM) of the synthesized probe **1** was prepared by dissolving the requisite amount of it in pure water. Stock solutions (1.0 M) of  $\text{Hg}^{2+}$  and various other cation ions were prepared by dissolving their nitrate salts in pure water.

## Synthesis of fluorescent probe 1

Phase-Transfer-catalyzed (PTC) coupling reaction of **4**<sup>[S1,S2]</sup> and resorufin **5** was conducted in 0.4 M aqueous  $\text{K}_2\text{CO}_3$ - $\text{CHCl}_3$ - $\text{Bu}_4\text{NBr}$  (tetrabutylammonium bromide) system at  $50^\circ\text{C}$ , and compound **6** was obtained in one-pot through consecutive glycosylation and HI elimination. After removal of the acetyl groups with  $\text{MeONa}/\text{MeOH}$  (keeping pH at 9), the desired water-soluble fluorescent probe **1** was obtained as pale yellow solid in 28% overall yield.

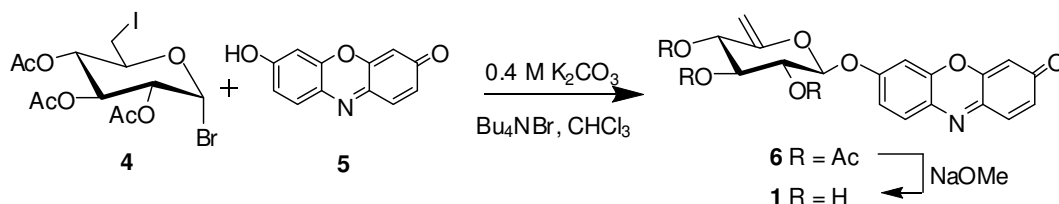

Compound **4** (120 mg, 0.25 mmol), resorufin **5** (53 mg, 0.25 mmol) and  $\text{Bu}_4\text{NBr}$  (8 mg, 0.025 mmol) were dissolved in  $\text{CHCl}_3$  (10 mL). 0.4 M aqueous  $\text{K}_2\text{CO}_3$  (10 mL) was added to the solution, the reaction mixture was allowed to stir 12 hours at  $50^\circ\text{C}$ , then cooled to room temperature. The reaction mixture was extracted with  $\text{CH}_2\text{Cl}_2$  (50 mL $\times$ 3). The combined organic layer was washed twice with water and dried over anhydrous  $\text{Na}_2\text{SO}_4$ . The solvent was removed by evaporation to give the crude intermediate **6** (100 mg), which was used directly for next step without further purification. The crude material **6** (100 mg) was dissolved in MeOH (20 mL),  $\text{NaOMe}$  was added to adjust the pH to 9. The resulting solution was stirred until TLC plate showed no starting material and a unique spot ( $R_f = 0.5$ ; ethyl acetate: methanol = 4:1). MeOH was removed at  $40^\circ\text{C}$  under reduced pressure, and then the residue was purified by silica gel column chromatography to give **1** (pale yellow solid, 25 mg, 28% for two steps).  $^1\text{H}$ NMR ( $(\text{CD}_3)_2\text{SO}$ , 400 MHz)  $\delta$  (TMS, ppm): 3.03-3.07 (m, 2H), 3.28 (t,  $J = 8.4$  Hz, 1H), 3.38-3.40 (m, 1H), 3.47 (t,  $J = 9.6$  Hz,

1H), 3.83 (d,  $J = 9.2$  Hz, 1H), 4.63 (d,  $J = 1.6$  Hz, 1H), 4.66 (d,  $J = 1.6$  Hz, 1H), 5.27 (d,  $J = 6.4$  Hz, 1H), 6.27 (d,  $J = 2.0$  Hz, 1H), 6.78 (dd,  $J = 2.0, 10.0$  Hz, 1H), 7.11-7.15 (m, 2H), 7.52 (dd,  $J = 2.0, 10.0$  Hz, 1H), 7.81 (d,  $J = 10.0$  Hz, 1H).  $^{13}\text{C}$ NMR ( $(\text{CD}_3)_2\text{SO}$ , 100 MHz)  $\delta$  (TMS, ppm): 71.2, 74.4, 76.2, 94.9, 101.7, 104.1, 107.1, 115.0, 130.1, 132.7, 135.3, 136.3, 146.2, 147.4, 150.9, 158.7, 161.3, 186.8. ESI(-)-MS: calcd. for  $\text{C}_{18}\text{H}_{15}\text{NO}_7$ : 357.1 [M]; found 392.2 [M+Cl] $^-$

## References

- [S1] C. Bullock, L. Hough and A. C. Richardson, *Carbohydr. Res.*, 1986, **147**, 330.  
[S2] H. S. Wessel, M. Trumtel and R. Minder, *J. Carbohydr. Chem.*, 1996, **15**, 523.

## General procedure for $\text{Hg}^{2+}$ detection

All the measurements were conducted according to the following process. A 0.2 mL of the stock solution of probe **1** was added into a 10 mL colorimetric tube, and an appropriate volume of  $\text{Hg}^{2+}$  sample solution was added. The final volume was adjusted to 10.00 mL with pure water and the reaction solution was mixed well. After 15 min at room temperature, a 40  $\mu\text{L}$  of 2 M PBS was added into the tube to buffer pH of solution at 7.4. A 3-mL portion of the reaction solution was transferred to a quartz cell of 1 cm optical length to measure fluorescence intensity ( $\lambda_{\text{ex}}/\lambda_{\text{em}} = 570/594$  nm, excitation and emission slit widths were of 2.5 nm). Simultaneously, a blank solution containing no  $\text{Hg}^{2+}$  was prepared and measured under the same conditions.

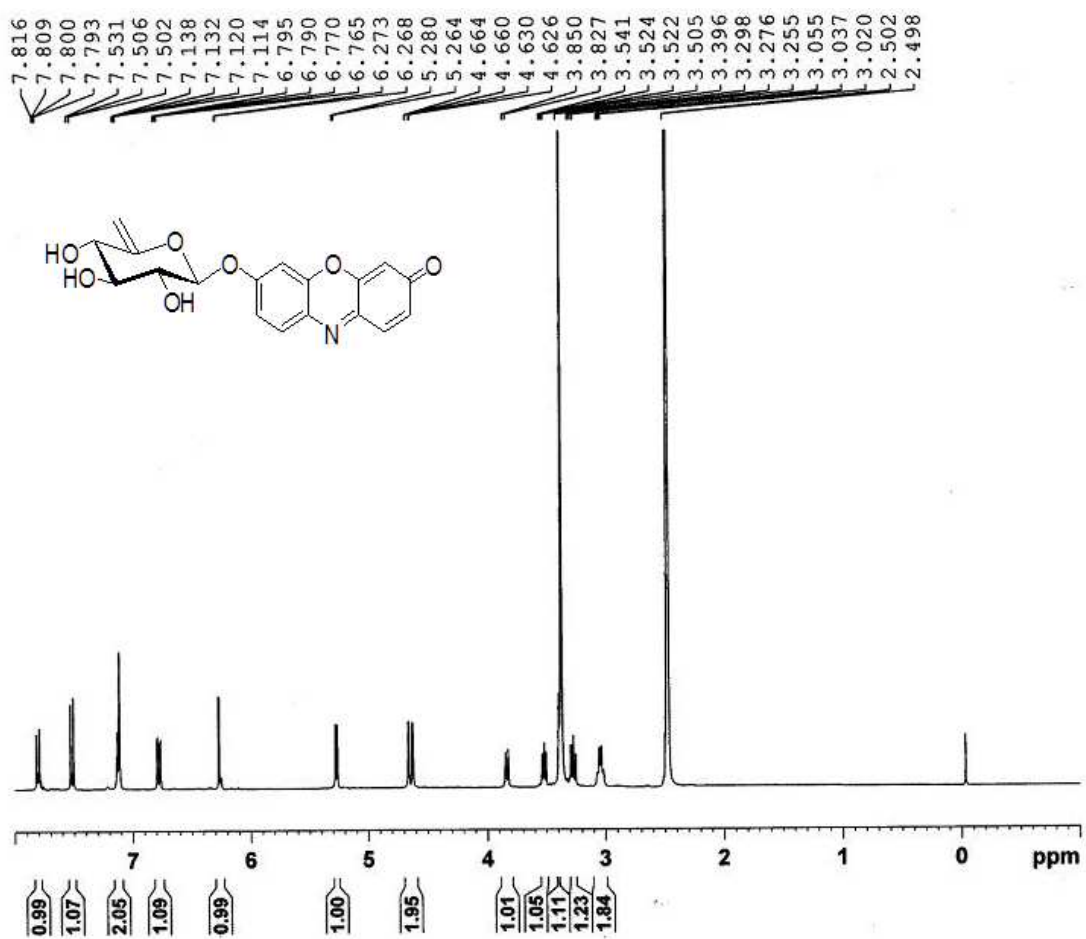

Fig. S1 <sup>1</sup>H NMR of probe 1.

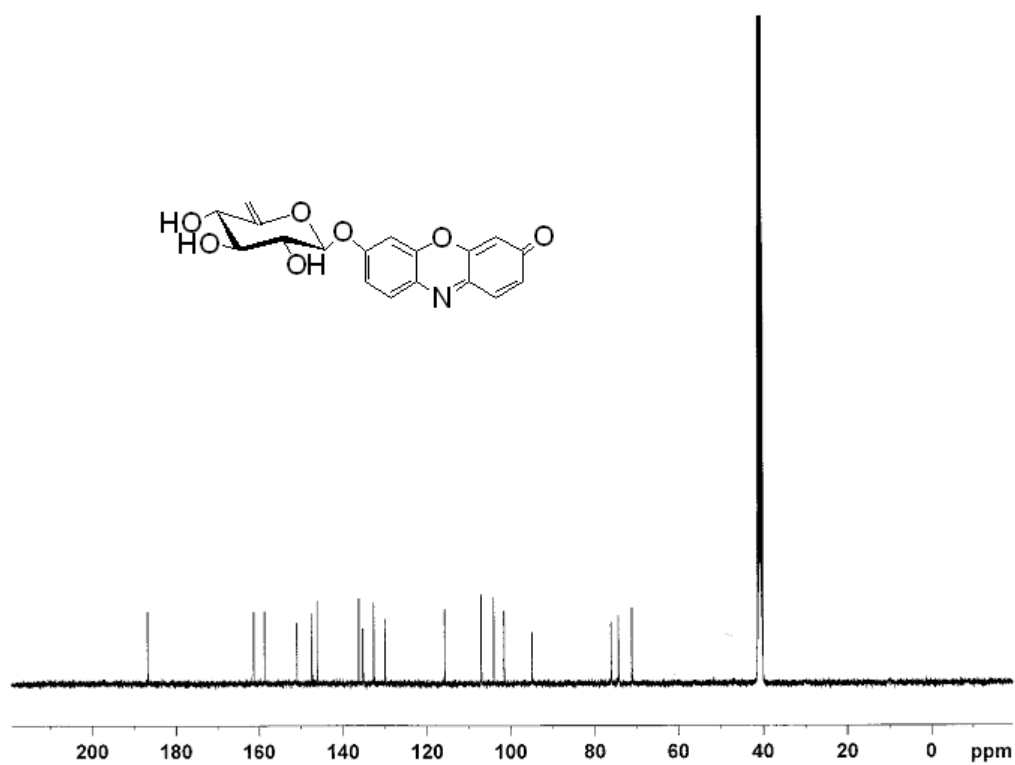

**Fig. S2** <sup>13</sup>C NMR of probe 1.

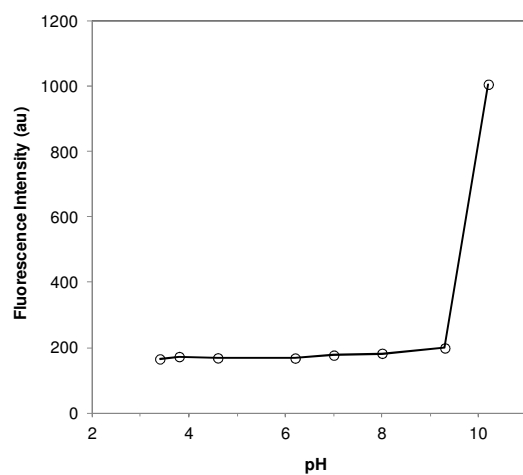

**Fig. S3** Fluorescence intensity ( $\lambda_{\text{ex}}/\lambda_{\text{em}} = 570/594$  nm, slit widths 2.5 nm) of probe **1** (1.0  $\mu\text{M}$  in pure water) vs pH variation at room temperature.

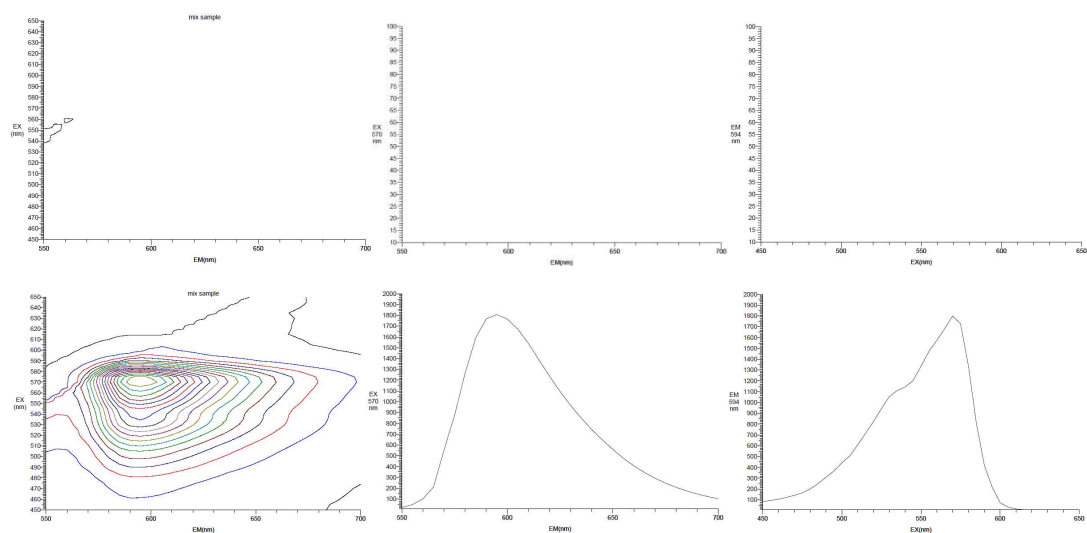

**Fig. S4** 3D-EEM of probe **1** (20  $\mu\text{M}$  in pure water) before and after adding  $\text{Hg}^{2+}$  (1.0  $\mu\text{M}$  in pure water) at room temperature.

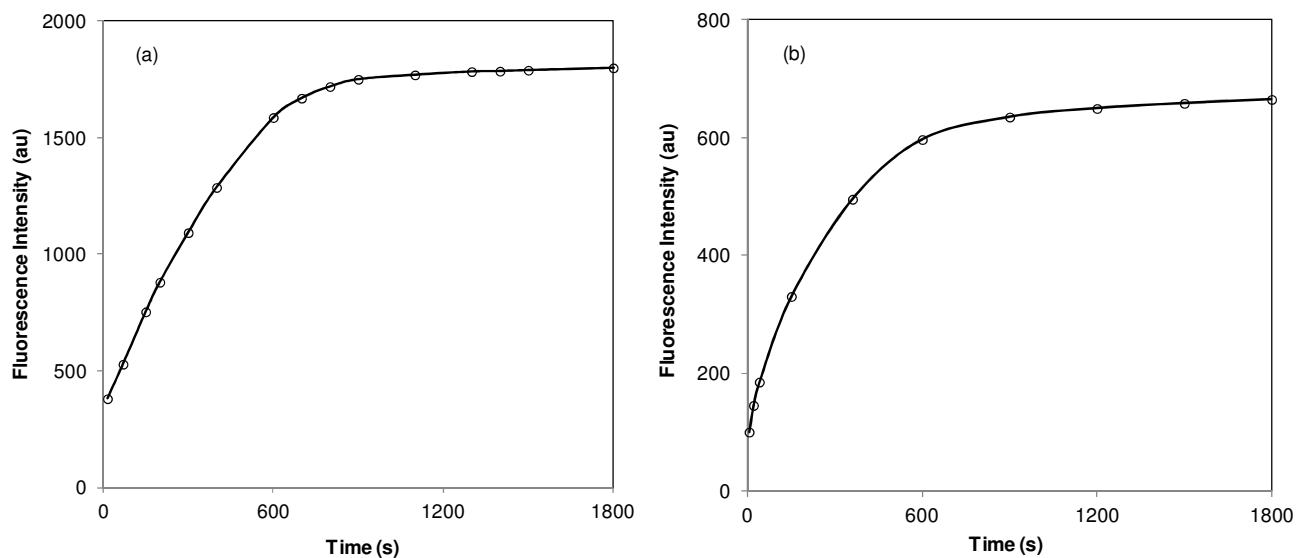

**Fig. S5** Time-dependent fluorescence intensity ( $\lambda_{\text{ex}}/\lambda_{\text{em}} = 570/594$  nm, slit widths 2.5 nm) for the mixture of **1** and  $\text{Hg}^{2+}$  at room temperature, measured in PBS buffer at pH 7.4. (a) Concentrations of probe **1** and  $\text{Hg}^{2+}$  were 20  $\mu\text{M}$  and 1.0  $\mu\text{M}$ , respectively, (b) Concentrations of probe **1** and  $\text{Hg}^{2+}$  were 1.0  $\mu\text{M}$  and 0.5  $\mu\text{M}$ , respectively,

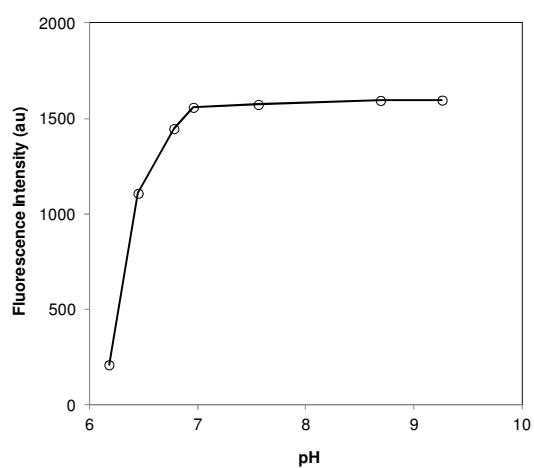

**Fig. S6** The variation of fluorescence intensity ( $\lambda_{\text{ex}}/\lambda_{\text{em}} = 570/594$  nm, slit widths 2.5 nm) of probe **1** (20  $\mu\text{M}$ ) in the presence of 1.0  $\mu\text{M}$  of  $\text{Hg}^{2+}$  with different pH values from 6.2 to 9.3.

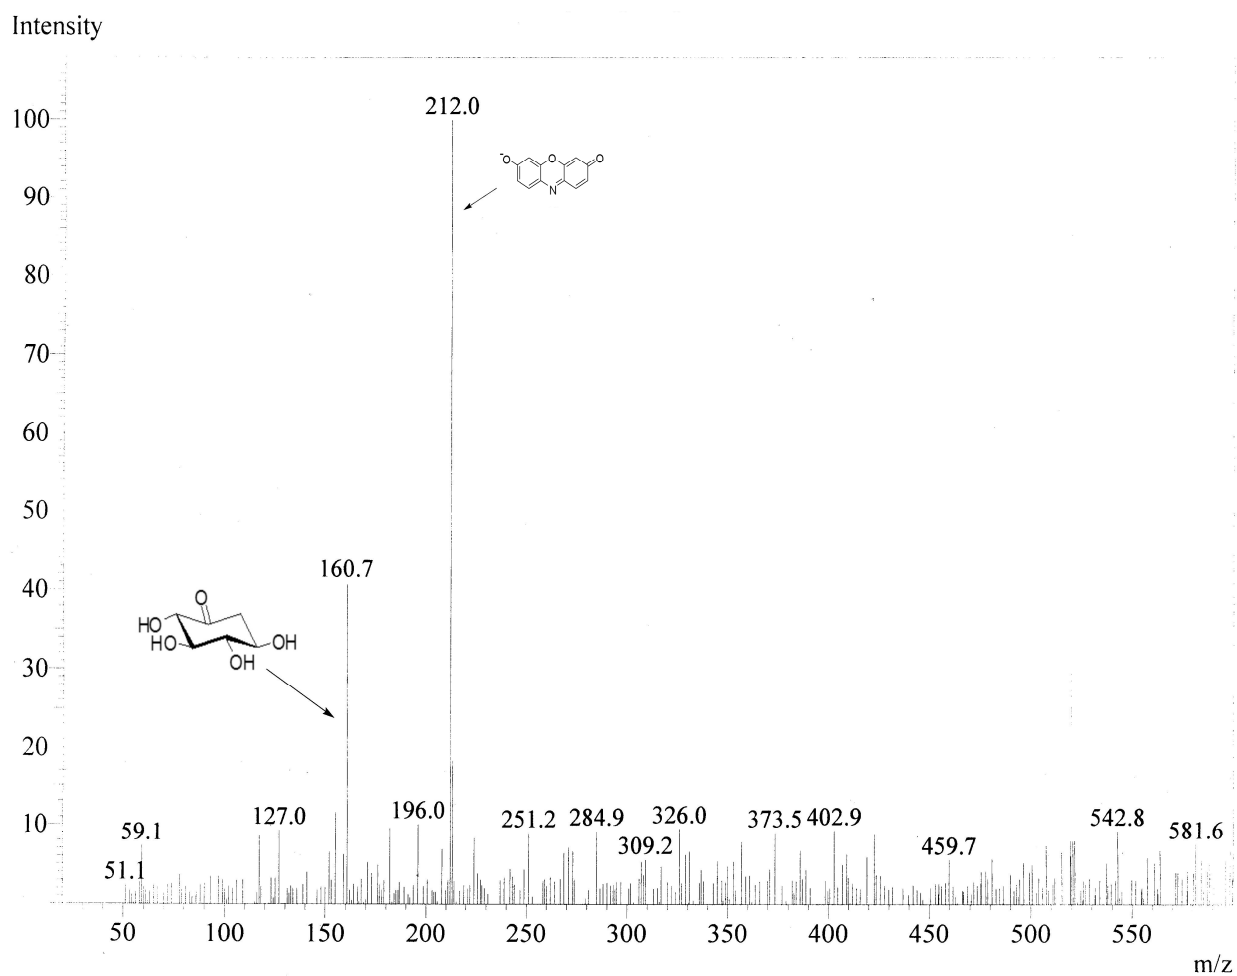

**Fig. S7** Crude mass spectrum (ESI mode) for the mixture of probe **1** and HgCl<sub>2</sub> in PBS buffer.

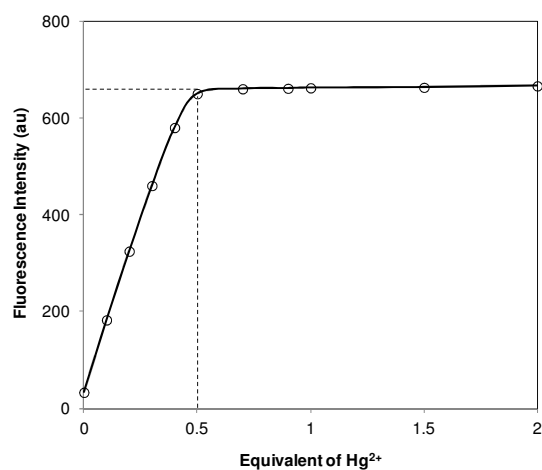

**Fig. S8** Fluorescence intensity changes ( $\lambda_{\text{ex}}/\lambda_{\text{em}} = 570/594$  nm, slit widths 2.5 nm) of probe **1** (1.0  $\mu\text{M}$  in pure water) as a function of equivalent of  $\text{Hg}^{2+}$  for each addition at room temperature (reacted 15 min and adjusted pH to 7.4 with PBS before determination).
